## Spinal Antinociceptive Effect of Epidural Nonsteroidal Antiinflammatory Drugs on Nitric Oxide–induced Hyperalgesia in Rats

Tatsuhiko Masue, M.D.,\* Shuji Dohi, M.D.,† Toshio Asano, M.D.,‡ Hiroyuki Shimonaka, M.D.§

**Background:** Nonsteroidal antiinflammatory drugs (NSAIDs) suppress various hyperalgesia perhaps *via* inhibition of cyclooxygenase activity at the spinal cord. The present study aimed to examine whether epidural application of NSAIDs affects hyperalgesia induced by nitric oxide.

**Methods:** The authors studied the antinociceptive effects of epidurally administered NSAIDs in rats with a chronically indwelling epidural catheter by three hyperalgesic models, including nitric oxide–induced hyperalgesia by nitroglycerin (10 µg) or L-arginine (100 µg), and the biphasic response in the formalin test.

**Results:** Epidural, but not systemic, nitroglycerin induced hyperalgesia that was completely blocked by methylene blue but not by N<sup>ω</sup>-nitro-L-arginine methyl ester (L-NAME). Epidural L-arginine, but not D-arginine, also induced hyperalgesia that was completely blocked by L-NAME. Epidural S(+)-ibuprofen (100–1,000 µg) suppressed the nitroglycerin- and L-arginine-induced thermal hyperalgesia and also the second phase response in the formalin test. Neither systemic S(+)-ibuprofen nor epidural R(-)-ibuprofen suppressed the hyperalgesia. Epidural indomethacin (10–100 µg) or diclofenac (10–1,000 µg) dose-dependently suppressed nitroglycerin-induced thermal

hyperalgesia. The order of potency for this suppression (ID<sub>50</sub> in µg) was indomethacin = diclofenac > S(+)-ibuprofen ≫ R(-)-ibuprofen.

**Conclusions:** The antinociceptive action of epidurally administered NSAIDs could be the result of suppression of spinal sensitization, perhaps induced with nitric oxide in the spinal cord. The ID<sub>50</sub> values for epidural indomethacin, diclofenac, and S(+)-ibuprofen were about 10 times higher than those reported in other studies for intrathecal NSAIDs in hyperalgesia models. (Key words: Cyclooxygenase inhibitors; NO donor; NO precursor; optical isomers; neuroplasticity.)

NONSTEROIDAL antiinflammatory drugs (NSAIDs) have long been known to exert potent antiinflammatory, analgesic, and antipyretic actions at peripheral sites.<sup>1</sup> However, an increasing body of experimental evidence indicates that such drugs also have a powerful effect on experimental pain states that is independent of their antiinflammatory effects.<sup>2</sup> NSAIDs are believed to reduce enhanced nociceptive activity in the periphery by inhibiting the enzyme cyclooxygenase (COX); this inhibits the generation of the prostaglandins (PGs) that sensitize afferent nociceptors to the effects of substances such as substance P and bradykinins.<sup>3</sup> In addition to their inhibition of PGs synthesis in the periphery, a central action of NSAIDs has been suggested by experimental studies in which they have been demonstrated to act more potently on intrathecal administration than on systemic administration.<sup>4–8</sup> Malmberg and Yaksh<sup>5</sup> reported that intrathecal NSAIDs produced a significant analgesic effect, as evidenced by behavioral responses in animals in experiments undergoing the formalin test. Because they showed a significant dose-related suppression of the second phase response in the formalin test (which is believed to indicate a hyperalgesic state), but not of the first phase response, the results of their study would seem to suggest that the spinal action of NSAIDs results from a suppression of spinal sensitization.

Several studies have been carried out to test the spinal antinociceptive effects of NSAIDs in hyperalgesia models, including the formalin test<sup>5,9,10</sup> and the writhing

\* Research Fellow, Department of Anesthesiology and Critical Care Medicine, Gifu University School of Medicine; Staff Anesthetist, Department of Anesthesia, Gifu Prefectural Hospital.

† Professor and Chair, Department of Anesthesiology and Critical Care Medicine, Gifu University School of Medicine.

‡ Instructor, Department of Anesthesiology and Critical Care Medicine, Gifu University School of Medicine.

§ Director, Department of Anesthesia, Gifu Prefectural Hospital; Clinical Associate Professor, Gifu University School of Medicine.

Received from the Department of Anesthesiology and Critical Care Medicine, Gifu University School of Medicine, Gifu City, Japan. Submitted for publication June 22, 1998. Accepted for publication February 22, 1999. Supported by grant-in-aid for Scientific Research No. 08457405 and 11307027, Ministry of Education, Science and Culture, Tokyo, Japan. Presented in part at the annual meeting of the American Society of Anesthesiologists, New Orleans, Louisiana, October 22, 1996, and at the meeting of the Japanese Society of Anesthesiology, Sapporo, Japan, May 26, 1999.

Address reprint requests to Dr. Dohi: Department of Anesthesiology and Critical Care Medicine, Gifu University School of Medicine, 40 Tsukasamachi, Gifu City, Gifu 500-8705, Japan. Address electronic mail to: shu-dohi@cc.gifu-u.ac.jp

## EFFECT OF EPIDURAL NSAIDS ON NO-INDUCED HYPERALGESIA

test,<sup>7</sup> as well in hyperalgesia models induced by the administration of agonists for the N-methyl-D-aspartate (NMDA) receptor and the neurokinin-1 tachykinin receptor.<sup>6</sup> Although nitric oxide (NO) is thought to play an important role in the production of hyperalgesia in such behavioral models,<sup>11</sup> no study has yet been performed to test the effects of NSAIDs on a hyperalgesia model directly related to NO. Systemic administration of L-arginine, an NO precursor, could antagonize a suppressive effect of NSAIDs such as acetaminophen,<sup>12</sup> diclofenac,<sup>13</sup> and S(+)-ibuprofen<sup>13</sup> on NMDA-induced scratching, biting, and licking behavior. However, no study has been appeared in the literature whether spinal sensitization primarily induced by an NO donor or L-arginine is suppressed by NSAIDs. Nitroglycerin, as an NO donor, can release NO by nonenzymatic reaction in the presence of some reducing compounds such as cysteine,<sup>14-16</sup> and a few studies have described that nitroglycerin, given intracerebroventricularly and systemically, could induce activities related to its effect of NO release in the central nervous system.<sup>17,18</sup> In the present study, we examined (1) whether epidural administration of nitroglycerin (an NO donor) and L-arginine (an NO precursor) would cause nociceptive behavior in rats, (2) whether epidural administration of NSAIDs, which is not studied enough<sup>19,20</sup> compared with intrathecal administration, would suppress such NO-induced hyperalgesia, and (3) whether the antinociceptive effect of NSAIDs would be parallel to their potency of cyclooxygenase inhibition.

## Materials and Methods

### Animal Preparation

The experimental procedures employed in the present study were approved by the Gifu University Animal Care and Use Committee (protocol ACCM-940010). Adult male Sprague-Dawley rats, weighing 400–500 g, were anesthetized with intraperitoneal pentobarbital and implanted with a chronic indwelling epidural catheter. After a laminectomy of the lower thoracic spines, the yellow ligament was punctured at T11–T12 without damaging the dura mater. A polyethylene (PE-10) catheter was inserted caudally for a distance of 1.5 cm through the hole in the yellow ligament and exteriorized at the neck. After recovery from the surgery, each rat was housed in an individual cage. Four to 7 days later, 150  $\mu$ l of 2% lidocaine was injected through the indwelling catheter, and analgesia was confirmed by the lack of response to a skin pinch. The tail-flick tests and the

formalin test were performed 1–8 weeks after catheter implantation, with only rats with normal motor function used. Finally, 50  $\mu$ l of methylene blue was injected through the catheter, and epidural staining was confirmed at autopsy.

### Drugs

The following drugs were used for epidural administration in the present study: S(+)-ibuprofen (molecular weight [MW] = 206.27; Research Biochemicals Incorporated, Natick, MA); R(-)-ibuprofen (MW = 206.27; Research Biochemicals); indomethacin (MW = 357.8; Sigma Chemical Company, St. Louis, MO); diclofenac (MW = 318.1; Sigma); nitroglycerin (MW = 227.09; Nippon Chemical Company, Takasaki, Japan); L-arginine hydrochloride (MW = 210.7; Sigma); D-arginine hydrochloride (MW = 210.7; Sigma); methylene blue (MW = 373.9; Sigma); and N<sup>ω</sup>-nitro-L-arginine methyl ester (L-NAME; MW = 269.7; Sigma). S(+)-ibuprofen, R(-)-ibuprofen, indomethacin, and diclofenac were dissolved in dimethylsulfoxide (DMSO). Nitroglycerin, L-arginine, D-arginine, methylene blue, and N<sup>ω</sup>-nitro-L-arginine methyl ester were dissolved in physiologic saline solution (0.9% weight/volume).

### Tail-flick Test

For assessment of the thermal-nociceptive response, a custom-made tail-flick analgesimeter (Natsume Co., Tokyo, Japan) was used. Tail-flick latencies (TF-L) were measured from the onset of a radiant heat stimulus applied to the tail as described previously.<sup>21</sup> Briefly, the light intensity was adjusted to yield mean baseline latencies of 4–6 s, and the cut-off time was set at 20 s to avoid damage to the tail. Before each drug trial, the baseline latency was measured. To study the suppression of hyperalgesia, “drug 1” (an antinociceptive drug) and “drug 2” (a hyperalgesic drug) were administered epidurally with a 10-min interval (table 1). Each epidural injection of a test drug was performed in a volume of 30  $\mu$ l followed by 20  $\mu$ l saline solution to flush out the catheter's dead space. Besides the epidural study, systemic effects of nitroglycerin and S(+)-ibuprofen were studied by intramuscular nitroglycerin and S(+)-ibuprofen. After administration of drugs, TF-L was measured at several time points, namely 5, 10, 20, 30, 40, 50, and 60 min after administration of drug 2.

### Formalin Test

The formalin test was performed in a manner similar to that previously described by others.<sup>22,23</sup> The rat was first

**Table 1. The Various Combinations of Drugs Administered through an Indwelling Epidural Catheter in the Tail Flick Test**

| Group            | Drug 1                  | Drug 2           |
|------------------|-------------------------|------------------|
| Control          | Vehicle (DMSO)          | Vehicle (saline) |
| NTG              | Vehicle (DMSO)          | NTG (10 µg)      |
| S(+)-ibp         | S(+)-ibp (1,000 µg)     | Vehicle (saline) |
| S(+)-ibp + NTG   | S(+)-ibp (10–1,000 µg)  | NTG (10 µg)      |
| R(-)-ibp + NTG   | R(-)-ibp (100–1,000 µg) | NTG (10 µg)      |
| Dic + NTG        | Dic (3.16–1,000 µg)     | NTG (10 µg)      |
| Ind + NTG        | Ind (1–100 µg)          | NTG (10 µg)      |
| L-NAME + NTG     | L-NAME (1,000 µg)       | NTG (10 µg)      |
| MB + NTG         | MB (100 µg)             | NTG (10 µg)      |
| L-arg            | Vehicle (DMSO)          | L-arg (100 µg)   |
| D-arg            | Vehicle (DMSO)          | D-arg (100 µg)   |
| S(+)-ibp + L-arg | S(+)-ibp (1,000 µg)     | L-arg (100 µg)   |
| L-NAME + L-arg   | L-NAME (1,000 µg)       | L-arg (100 µg)   |

DMSO = dimethylsulfoxide; NTG = nitroglycerin; S(+)-ibp = S(+)-ibuprofen; R(-)-ibp = R(-)-ibuprofen; Dic = diclofenac; Ind = indomethacin; L-NAME = *N*<sup>ω</sup>-nitro-L-arginine methyl ester; MB = methylene blue; L-arg = L-arginine; D-arg = D-arginine.

In each rat drug 1 and drug 2 were administered through an indwelling epidural catheter with a 10-min interval.

transferred into a clear perspex box. Thirty minutes later, S(+)-ibuprofen, R(-)-ibuprofen, or vehicle (control) was administered epidurally. Ten minutes later, 50 µl of 5% formalin (prepared from a 37% formaldehyde solution by 1:19 dilution with physiologic saline solution) was injected subcutaneously into the dorsal surface of the left hindpaw using a 30-gauge needle. For 65 min after the injection, the response to the pain-like stimulus was recorded for each rat. The total time for which the paw was kept in a raised position during a given period was taken as an indicator of the response.

#### Behavioral Assessment

The rat's general behavior was observed after the administration of each drug tested. Motor functions were tested by examining the placing and stepping reflex and the righting reflex. Agitation behavior was assessed by observing behavior before and after the nociceptive stimulation.

#### Release of NO from Nitroglycerin In Vitro

To examine whether nitroglycerin given epidurally releases nitric oxide in the peri-spinal cord level, we have done the following *in vitro* experiments in the presence of the spinal cord tissue removed from rats. Adult male Sprague-Dawley rats were decapitated, and the spinal cords were removed. Cell suspension of the spinal cords was prepared through the homogenization and centrifugation. Final suspension of the spinal cord was prepared with the

phosphate buffer saline (PBS). A reaction mixture, 1.8 ml, containing 1 or 0.1 mM nitroglycerin with the spinal cell suspension or 50 mM L-cysteine in the PBS was incubated at 37°C for 60 min. Each control experiment was performed without nitroglycerin, the spinal cell suspension, or L-cysteine. The measurement of nitrite content was performed as described previously<sup>24,25</sup> with some modifications: the nitrite in the samples was measured by fluorescence intensity at 460 nm when mixed with 2,3-diaminonaphthalene.

#### Statistical Analysis

For the tail-flick test, time-response data were calculated as the percentage changes in TF-L according to the formula:

$$\begin{aligned} & \% \text{ change in TF-L} \\ &= \frac{(\text{TF-L after administration of drugs}) - (\text{mean baseline latency})}{(\text{mean baseline latency})} \times 100 \end{aligned}$$

To enable an assessment to be made of the suppressant effects of NSAIDs on nitroglycerin-induced hyperalgesia, suppression ratios were calculated as:

$$\begin{aligned} & \{(\% \text{ change in TF-L in rats injected with an NSAID and nitroglycerin}) - (\% \text{ change in TF-L in rats injected with nitroglycerin})\} \\ & \div \{(\% \text{ change in TF-L in rats injected with vehicle}) - (\% \text{ change in TF-L in rats injected with nitroglycerin})\} \end{aligned}$$

Dose-response curves for NSAIDs were obtained by taking the average of the suppression ratios at the observation points 10, 20, 30, 40, 50, and 60 min after administration of drug 2.

For the formalin test, time-response data are presented as the paw-raised time/min for the periods 0–5, 5–15, 15–25, 25–35, 35–45, 45–55, and 55–65 min after the injection of formalin.

The statistical significance of differences between treatment groups was assessed by means of an analysis of variance (ANOVA) for repeated measures. Significance was taken to be indicated by a *P* value of < 0.05.

## Results

#### Hyperalgesia Models

Epidural administration of nitroglycerin (10 µg) shortened the TF-L within 5 min (thermal hyperalgesia). This

## EFFECT OF EPIDURAL NSAIDS ON NO-INDUCED HYPERALGESIA

Fig. 1. Shortening of tail-flick latency caused by epidural administration of nitroglycerin (10  $\mu$ g). (A) Time effect curve in the tail-flick test. Each symbol shows the mean  $\pm$  SD from five animals. The tail-flick latency had returned to the control level by 180 min. (B) Comparison of the effect of nitroglycerin on the date when the tail-flick test was performed. Each symbol shows the mean  $\pm$  SD of the data obtained at 10, 20, 30, 40, 50, and 60 min in 8–10 animals. There was not a statistically significant difference ( $P = 0.66$ ) between the group of 1–3 weeks after catheter implantation and that of 5–8 weeks after catheter implantation (ANOVA for repeated measures).

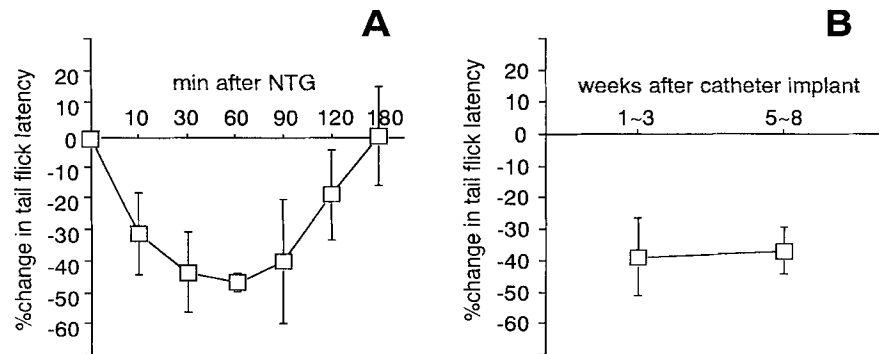

effect was stable in the period of 10–90 min and returned to the control level in 180 min (fig. 1A). There was no significant difference in the nitroglycerin-induced hyperalgesia between the group tested 1–3 weeks after catheter implantation and that tested 5–8 weeks after catheter implantation (fig. 1B). Epidural nitroglycerin, 1  $\mu$ g, also reduced the TF-L (to about the same extent as 10  $\mu$ g). Nitroglycerin (1 and 10  $\mu$ g) produced transient agitation behavior (slight biting and scratching), although this disappeared within 10 min in all rats. Both the hyperalgesia and agitation behavior were prevented by pretreatment with epidural methylene blue (100  $\mu$ g) administered 10 min before the nitroglycerin, but not by pretreatment with epidural N<sup>w</sup>-nitro-L-arginine

nine methyl ester (L-NAME, 1,000  $\mu$ g) (fig. 2). Administration of nitroglycerin (10  $\mu$ g) by the intramuscular route did not induce such hyperalgesia or agitation behavior (fig. 2).

Epidural administration of L-arginine (100  $\mu$ g), but not of D-arginine (100  $\mu$ g), shortened the TF-L within 20 min, producing a slowly developing thermal hyperalgesia without agitation behavior such as scratching or biting (fig. 2). The hyperalgesia was prevented by pretreatment with epidural L-NAME (1,000  $\mu$ g) administered 10 min before the L-arginine (fig. 2).

Formalin injection into a rat's paw produced paw-lifting behavior with two distinct phases. The first phase of the response occurred over the period from 0–5 min

Fig. 2. Summary of the effects of drugs used in the tail-flick test. Each bar shows the mean  $\pm$  SD of the data obtained at 10, 20, 30, 40, 50, and 60 min in five animals. For the groups of epidural administration, abbreviations are as in table 1, and doses used were as table 1, except: S(+)-ibp + NTG, S(+)-ibuprofen 1,000  $\mu$ g + nitroglycerin 10  $\mu$ g; R(-)-ibp + NTG, R(-)-ibuprofen 1,000  $\mu$ g + nitroglycerin 10  $\mu$ g. For the groups of systemic administration, NTG means intramuscular nitroglycerin 10  $\mu$ g, and S(+)-ibp + NTG means intramuscular S(+)-ibuprofen 1,000  $\mu$ g + epidural nitroglycerin 10  $\mu$ g. Statistical significance was determined by ANOVA for repeated measures. \*\* $P < 0.01$ , \*\*\* $P < 0.001$  and NS indicates  $P > 0.05$ . There was a statistically significant difference ( $P < 0.05$ ) between the following pairs of groups: control versus nitroglycerin; nitroglycerin versus S(+)-ibuprofen + nitroglycerin; nitroglycerin versus methylene blue + nitroglycerin; control versus L-arginine; L-arginine versus D-arginine; L-arginine versus S(+)-ibuprofen + L-arginine; and L-arginine versus L-NAME + L-arginine.

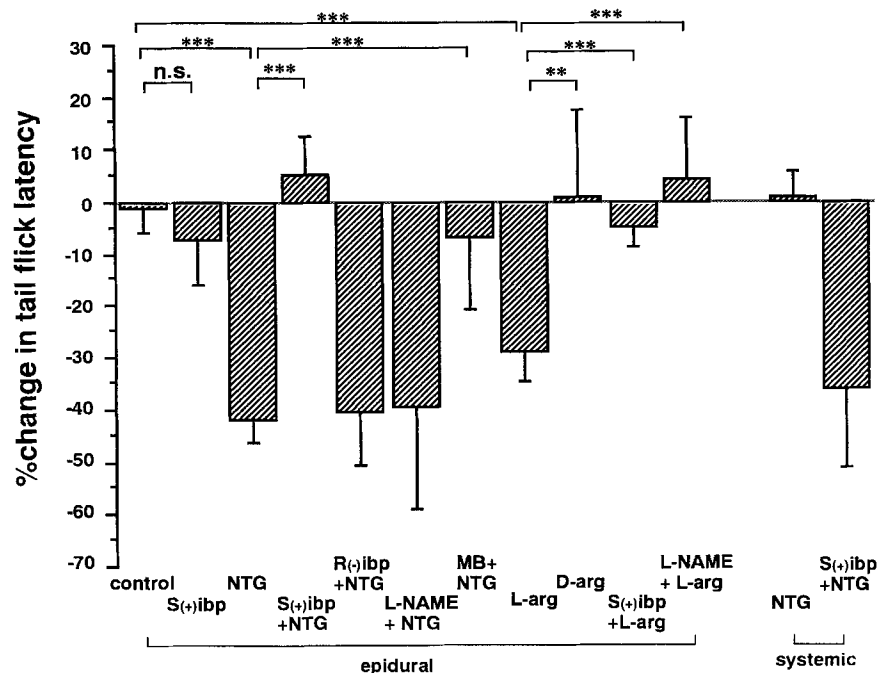

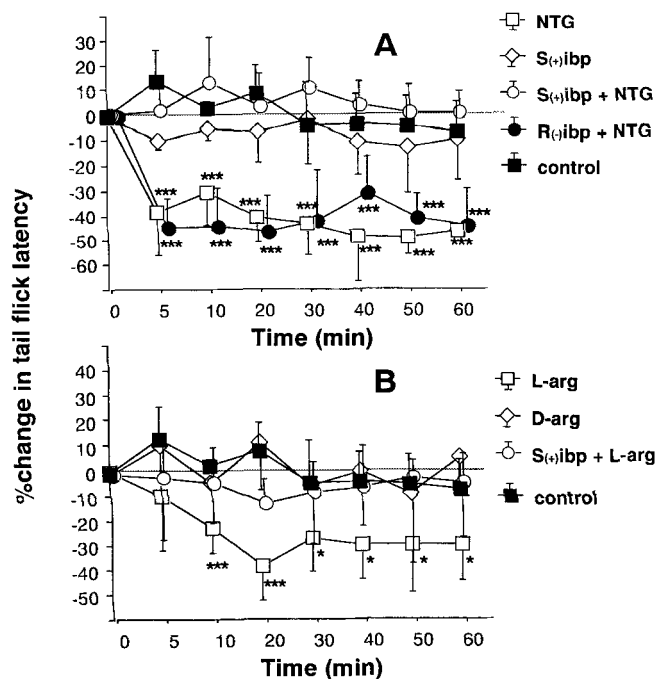

Fig. 3. (A, B) Time effect curves for various drugs in the tail flick test. Each symbol shows the mean  $\pm$  SD from five animals. Abbreviations are as in table 1, and doses used were as in figure 2. \* $P < 0.05$ ; \*\* $P < 0.01$ ; \*\*\* $P < 0.001$  versus control value at same time-point (ANOVA and Bonferroni-Dunn *post hoc* test). The groups administered NTG, and R(-)-ibp + NTG had a statistically significant difference ( $P < 0.0001$ ) with the control group in the data at 10–60 min (ANOVA for repeated measures).

after the injection, and the second phase occurred 15–65 min after the injection.

#### Effects of NSAIDs in Hyperalgesia Models

**Nitroglycerin-induced and L-arginine-induced Hyperalgesia.** Animals given epidural injections of S(+)-ibuprofen (1,000  $\mu$ g) and saline (vehicle) as drugs 1 and 2 did not show any change in TF-L (fig. 2; fig. 3A). Epidural nitroglycerin shortened the TF-L significantly, an effect that remained stable for 60 min. Pretreatment with epidural S(+)-ibuprofen (1,000  $\mu$ g) completely prevented this change, indicating suppression of the nitroglycerin-induced hyperalgesia (figs. 2 and 3A). Pretreatment with epidural S(+)-ibuprofen (1,000  $\mu$ g) also blocked the L-arginine-induced hyperalgesic state (figs. 2 and 3B). In contrast, epidural administration of R(-)-ibuprofen (1,000  $\mu$ g) did not block the hyperalgesia induced by either nitroglycerin (figs. 2 and 3A) or L-arginine (data not shown). As shown in figure 4, the suppression of the nitroglycerin-induced hyperalgesia that was induced by epidural S(+)-ibuprofen (10–1,000

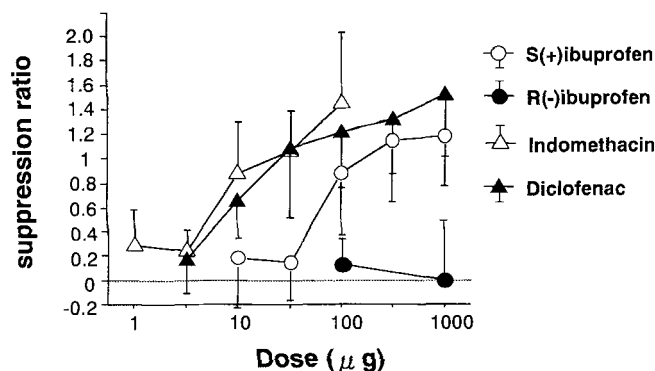

Fig. 4. Dose-response curves for the suppression by epidural NSAIDs of nitroglycerin-induced hyperalgesia in the tail flick test. Each NSAID was epidurally administered 10 min before nitroglycerin. Ordinate shows "suppression ratio" (calculated as described in Materials and Methods). Each symbol shows mean  $\pm$  SD of the data obtained at 10, 20, 30, 40, 50, and 60 min in five animals. The doses producing 50% inhibition of the nitroglycerin-induced hyperalgesia were as follows: 5.0  $\mu$ g for indomethacin; 6.3  $\mu$ g for diclofenac; 52  $\mu$ g for S(+)-ibuprofen; and > 1,000  $\mu$ g for R(-)-ibuprofen.

$\mu$ g) occurred in a dose-dependent manner, as did the suppressions induced by epidural indomethacin (1–100  $\mu$ g) and diclofenac (3.16–1,000  $\mu$ g).

The rank order of the doses producing 50% inhibition of the nitroglycerin-induced hyperalgesia ( $ID_{50}$ ) was indomethacin (5.0  $\mu$ g)  $\approx$  diclofenac (6.3  $\mu$ g) > S(+)-ibuprofen (52 mg)  $\gg$  R(-)-ibuprofen (> 1,000  $\mu$ g) (fig. 4; table 2). The maximal suppression ratios obtained with S(+)-ibuprofen, indomethacin, and diclofenac were in each case more than 1 (fig. 4; table 2). In rats injected with indomethacin (100  $\mu$ g) followed by nitroglycerin and in rats injected with diclofenac (1,000  $\mu$ g) followed by nitroglycerin, TF-Ls were significantly longer than in rats injected with DMSO and saline (control).

In contrast to its effect on epidural administration, S(+)-ibuprofen (1,000  $\mu$ g) injected by the systemic (in-

Table 2. Ability of Epidural NSAIDs to Suppress Hyperalgesia Induced by Epidural Nitroglycerin

| Drug           | $ID_{50}$ ( $\mu$ g) and 95% Confidence Interval | Maximal Suppression Ratio $\pm$ SD |
|----------------|--------------------------------------------------|------------------------------------|
| S(+)-ibuprofen | 52 (38–66)                                       | 1.18 $\pm$ 0.40                    |
| R(-)-ibuprofen | >1,000                                           | 0.14 $\pm$ 0.21                    |
| Diclofenac     | 6.3 (5.7–7.6)                                    | $\approx$ 1.53 $\pm$ 0.50          |
| Indomethacin   | 5.0 (2.8–7.3)                                    | $\approx$ 1.44 $\pm$ 0.58          |

$ID_{50}$  values were calculated as the dose producing 50% inhibition of nitroglycerin-induced hyperalgesia. Maximal suppression ratio is shown as mean  $\pm$  SD for five rats; it indicates the highest suppression ratio obtained with each drug.

## EFFECT OF EPIDURAL NSAIDS ON NO-INDUCED HYPERALGESIA

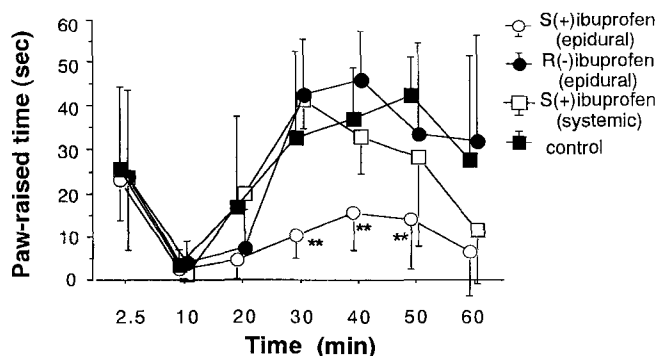

**Fig. 5.** Time-effect curves for S(+)-ibuprofen and R(-)-ibuprofen in the formalin test. S(+)-ibuprofen means S(+)-ibuprofen 1,000  $\mu$ g and R(-)-ibuprofen means R(-)-ibuprofen 1,000  $\mu$ g. Each drug was administered 10 min before the formalin injection. Each symbol shows mean  $\pm$  SD of the total numbers of s for which the paw was kept raised per min in five to seven animals. The data points were obtained as described in Materials and Methods. \* $P < 0.05$ ; \*\* $P < 0.01$ ; \*\*\* $P < 0.001$  versus control value at same time-point (ANOVA and Bonferroni-Dunn post hoc test). The group administered S(+)-ibuprofen had a statistically significant difference ( $P < 0.001$ ) with the control group in the data during 15–65 min (ANOVA for repeated measures).

tramuscular) route did not affect the shortening of the TF-L induced by epidural nitroglycerin (fig. 2).

**Formalin Test.** On epidural administration, S(+)-ibuprofen (1,000  $\mu$ g), but not R(-)-ibuprofen (1,000  $\mu$ g), suppressed the second phase paw-lifting behavior (fig. 5). In contrast, systemic (intramuscular) administration of S(+)-ibuprofen (1,000  $\mu$ g) did not cause any change in second phase paw-lifting behavior. Neither S(+)-ibuprofen nor R(-)-ibuprofen affected the first phase paw-lifting behavior.

**Behavioral Assessment.** Although transient agitation behavior associated with epidural nitroglycerin was observed (see above), no evidence of severe neurotoxicity (seizures or motor paresis) was seen. Epidural administration of S(+)-ibuprofen, R(-)-ibuprofen, indomethacin, or diclofenac did not elicit motor paresis, seizures, or any agitation behavior.

**Release of NO from Nitroglycerin *In Vitro*.** When nitroglycerin was given into the cell suspension of the spinal cord and L-cysteine, nitrite was detected in a dose-dependent fashion significantly more than when nitroglycerin was given in the PBS (table 3).

## Discussion

The present results indicate that epidural administration of either nitroglycerin or L-arginine, but neither the systemic nitroglycerin nor epidural D-arginine, produces

a significant shortening of TF-L that lasts for more than 60 min. This nitroglycerin-induced hyperalgesia was blocked by methylene blue but not by L-NAME, and the L-arginine-induced hyperalgesia was blocked by L-NAME. Epidural S(+)-ibuprofen, indomethacin, and diclofenac, but not R(-)-ibuprofen, suppressed thermal hyperalgesia. The rank-order of potency for the antinociceptive effects of the various NSAIDs on the nitroglycerin-induced thermal hyperalgesia agrees with those for inhibition of cyclooxygenase-2 (COX-2) activity observed *in vitro*.<sup>26–28</sup> Our results are also in accord with the previous finding that intrathecal indomethacin and S(+)-ibuprofen, although epidural doses were 10 times or more higher than those used here, suppressed the second phase response in the formalin test<sup>5</sup> (table 4).

Nonsteroidal antiinflammatory drugs have been found to work centrally in animals.<sup>4–8,29,30</sup> Several reports indicate that the second phase response in the formalin test, which is believed to be a response to the production of a hyperalgesic state, can be blocked by the intrathecal NSAIDs, which are 100–1,000 times more potent than systemic administration.<sup>5</sup> The results obtained with epidural NSAIDs in the present study are in accord with those obtained by others using intrathecal NSAIDs.<sup>4–8</sup> It is suggested that NSAIDs could block the release of glutamate, aspartate, and substance P evoked by the subcutaneous injection of formalin in the spinal cord.<sup>23</sup> Because systemic S(+)-ibuprofen did not affect the nitroglycerin-induced hyperalgesia and because epidural S(+)-ibuprofen did not affect either the basal TF-L or the first phase response in the formalin test, it can be concluded that epidural S(+)-ibuprofen suppresses the hyperalgesic state, but not acute noxious responses, through an action on antinociceptive processing at the spinal level.

**Table 3.** The Concentration of Nitrite in Reaction Mixtures in Which Nitroglycerin Was Incubated with Spinal Cell Suspension or L-Cysteine *In Vitro*

|            | Spinal Cell Suspension | L-Cysteine       | PBS             |
|------------|------------------------|------------------|-----------------|
| NTG 1 mM   | 1.87 $\pm$ 0.29*       | 1.82 $\pm$ 0.71* | 0.65 $\pm$ 0.35 |
| NTG 0.1 mM | 0.28 $\pm$ 0.09†       | 0.24 $\pm$ 0.06† | 0.04 $\pm$ 0.07 |
| PBS        | 0.00                   | 0.00             | 0.00            |

NTG = nitroglycerin; PBS = phosphate buffer saline.

Data are mean  $\pm$  SD of the concentration ( $\mu$ M) of nitrite in three or four experiments. The concentration of nitrite in the mixture of nitroglycerin and cell suspension of the spinal cord was higher than that of the control.

\*  $P < 0.01$  versus control (ANOVA and Bonferroni/Dunn post hoc test).

†  $P < 0.05$  versus control (ANOVA and Bonferroni/Dunn post hoc test).

Table 4. Summary of Behavioral Studies Assessing Central Antinociceptive Effects of NSAIDs in Rats

| Experimental Model and Route of Administration | Inhibitory Dose Resulting in a 50% Reduction of Nociceptive Responses (ID <sub>50</sub> ; $\mu$ g)* |            |                |                | References                           |
|------------------------------------------------|-----------------------------------------------------------------------------------------------------|------------|----------------|----------------|--------------------------------------|
|                                                | Indomethacin                                                                                        | Diclofenac | S(+)-ibuprofen | R(-)-ibuprofen |                                      |
| NTG-induced thermal hyperalgesia               |                                                                                                     |            |                |                |                                      |
| epi                                            | 5.0                                                                                                 | 6.3        | 52             | >1,000         | Masue et al.†                        |
| im                                             |                                                                                                     |            | >1,000         |                | Masue et al.†                        |
| NMDA-induced thermal hyperalgesia              |                                                                                                     |            |                |                |                                      |
| it                                             |                                                                                                     |            | <5.6           | >1,000         | Malmberg and Yaksh 1992 <sup>6</sup> |
| Second phase in the formalin test              |                                                                                                     |            |                |                |                                      |
| epi                                            |                                                                                                     |            | <1,000         | >1,000         | Masue et al.†                        |
| im                                             |                                                                                                     |            | >1,000         |                | Masue et al.†                        |
| it                                             | 0.68                                                                                                |            | 3.2            | >56            | Malmberg and Yaksh 1992 <sup>5</sup> |
| ip                                             | 930                                                                                                 |            |                |                | Malmberg and Yaksh 1992 <sup>5</sup> |
| Writhing reflex in the writhing test           |                                                                                                     |            |                |                |                                      |
| it                                             |                                                                                                     | 3          |                |                | Björkman 1995 <sup>7</sup>           |
| sc                                             |                                                                                                     | 300        |                |                | Björkman 1995 <sup>7</sup>           |

epi = epidural; im = intramuscular; it = intrathecal; ip = intraperitoneal; sc = subcutaneous.

\* In the case of single-dose studies, data are preceded by > (more than 50% inhibition at the dose shown) or < (less than 50% inhibition at the dose shown).

† The present study.

Intrathecal L-NAME, an NO synthase inhibitor, has been observed to suppress the second phase response in the formalin test<sup>11</sup> and NMDA-induced hyperalgesia.<sup>11</sup> In the present study, we confirmed that nitroglycerin, an NO donor, is able to produce a hyperalgesic state when administered into the epidural space. Although this is the first demonstration that such hyperalgesia can be produced with nitroglycerin, in a previous study intrathecal sodium nitroprusside (SNP), another NO donor, has been reported to induce thermal hyperalgesia in the tail-flick test, an effect that could be antagonized with hemoglobin, an NO scavenger.<sup>31</sup> SNP is generally believed to evoke the release of immunoreactive calcitonin gene-related peptide (CGRP) and substance P from the dorsal horn.<sup>32</sup> However, SNP is not ideal for this purpose because intrathecal SNP in mice elicits severe neurotoxicity and excitatory responses such as intense biting and scratching accompanied by vocalization and seizures,<sup>31</sup> and sodium ferricyanide (the coproduct of SNP) also evokes the release of CGRP and substance P from the dorsal horn.<sup>32</sup> Nitroglycerin is strongly lipophilic with rather low molecular weight (MW, 227.09). Although the mechanisms in which nitroglycerin produces NO are not completely clear,<sup>16</sup> nitroglycerin could release NO with non-enzymatic reaction in the presence of some reducing agents such as cysteine *in vitro*.<sup>14-16</sup> We found that nitroglycerin induced NO in the presence of the rat's spinal cord similar to in the presence of L-cysteine *in vitro*. Nitroglycerin injected into the epidural space could reach the spinal cord by crossing the dural mem-

branes and release some amount of NO, which would then act as a messenger in nociceptive transmission involving the NO-cGMP system. This sequence of events is likely to form the basis of the present nitroglycerin-induced hyperalgesia model because the hyperalgesic state induced by epidural nitroglycerin was completely blocked by methylene blue, a guanylate cyclase inhibitor. This idea is further supported by our finding that epidural L-arginine, a physiologic precursor of NO, although slower in onset than that induced by nitroglycerin, induced a similar thermal hyperalgesia, which was blocked by L-NAME.

It is possible that potential inflammation or vasodilation in the epidural space originated by nitroglycerin could stimulate peripheral nerve and induce spinal sensitization. Since in the present result, pretreatment with L-NAME did not affect the time course of nitroglycerin-induced hyperalgesic state, we can exclude the possibility that endogenous NO, even if released due to potential inflammation in the epidural space, could cause spinal sensitization in our rat experiments. Spinal sensitization induced by noxious stimuli to the peripheral site such as epidural space is mediated *via* releasing endogenous NO or activation of NO synthase.<sup>11</sup> NO *per se* seems to suppress, not to facilitate, peripheral nerve axonal conduction and thus nociceptive transmission.<sup>33,34</sup> Because we administered nitroglycerin after injecting NSAIDs or methylene blue, it is also possible that they could affect the release of NO from nitroglycerin. However, NO release from nitroglycerin is unlikely to be affected with

## EFFECT OF EPIDURAL NSAIDS ON NO-INDUCED HYPERALGESIA

the presence of an NSAID *in vitro*.<sup>35</sup> However, without measuring NO in the spinal cord, we cannot provide a conclusive answer to an important question: namely, whether epidural injection of nitroglycerin and L-arginine does lead to an increase in NO (exogenously or endogenously, respectively).

The epidural administration of drugs, although applicable to clinical practice, creates some problems of access. Because most NSAIDs have the characteristic of intermediate hydrophobicity (n-octanol/water partition coefficients = 1–4),<sup>36</sup> they would be expected to diffuse through the dural membranes,<sup>37</sup> and thus act on the spinal cord directly, although considerable dilution would occur due to the presence of cerebrospinal fluid. Because NSAIDs, which have a molecular weight of around 250–300, penetrate the blood–brain barrier,<sup>38–40</sup> another possible route for epidurally injected NSAIDs would involve transport to the spinal cord *via* the radicular arteries after their absorption through the epidural vasculature, and a consequent supraspinal action.<sup>41</sup> In addition to their central action both on spinal and supraspinal levels, NSAIDs' peripheral action could also augment the spinal antinociceptive processing. The suppression of nociceptive processing at the spinal site might expand the peripheral suppression of NSAIDs on inflammatory as well as nociceptive processings probably *via* additional mechanisms independent of prostaglandin synthesis inhibition.<sup>42</sup> Thus when a higher dose of NSAIDs given in the epidural space, it is possible that epidural route of NSAIDs administration could provide an excellent analgesia *via* action of peripheral, spinal, and supraspinal sites.

We have shown that epidural NSAIDs produced antinociceptive action in NO-induced hyperalgesic state. An animal study also indicates that epidural, but not intravenous, S(+)-ibuprofen, 10 mg, produces an antinociceptive effect without any evidence of motor dysfunction or neurotoxicity.<sup>19</sup> As the adverse effects (such as upper gastrointestinal bleeding, coagulopathy, hepatotoxicity, etc.) associated with systemic NSAIDs are dose-related,<sup>43,44</sup> epidural NSAIDs may provide a useful level of analgesia on a regional basis in patients with hyperalgesia without producing such untoward reactions. Recently, it is reported that two patients with cancer pain, when given accidentally NSAIDs into the epidural space, had excellent analgesia without any toxicity.<sup>20</sup> However, because NSAIDs administered epidurally may be in a high concentration close to the spinal cord, a neural structure that normally has a marginal flow, and because COX has recently been reported to play a role as a

neurotransmitter in the central nervous system,<sup>45</sup> further studies will be needed to investigate their neurotoxicity and the relation between spinal cord blood flow characteristics and neuronal activity under various conditions.

## References

1. Vinegar R, Truax JF, Selph JL: Quantitative comparison of the analgesic and anti-inflammatory activities of aspirin, phenacetin and acetaminophen in rodents. *Eur J Pharmacol* 1976; 37:23–30
2. Hunskaar S, Hole K: The formalin test in mice: Dissociation between inflammatory and non-inflammatory pain. *Pain* 1987; 30:103–14
3. Ferreira SH: Prostaglandins, aspirin-like drugs and analgesia. *Nature* 1972; 240:200–3
4. Taiwo YO, Levine JD: Prostaglandins inhibit endogenous pain control mechanisms by blocking transmission at spinal noradrenergic synapses. *J Neurosci* 1988; 8:1346–9
5. Malmberg AB, Yaksh TL: Antinociceptive actions of spinal non-steroidal anti-inflammatory agents on the formalin test in the rat. *J Pharmacol Exp Ther* 1992; 263:136–46
6. Malmberg AB, Yaksh TL: Hyperalgesia mediated by spinal glutamate or substance P receptor blocked by spinal cyclooxygenase inhibition. *Science* 1992; 257:1276–9
7. Björkman R: Central antinociceptive effects of non-steroidal anti-inflammatory drugs and paracetamol. Experimental studies in the rat. *Acta Anaesthesiol Scand Suppl* 1995; 103:1–44
8. Jurna I, Spohrer B, Bock R: Intrathecal injection of acetylsalicylic acid, salicylic acid and indometacin depress C fibre-evoked activity in the rat thalamus and spinal cord. *Pain* 1992; 49:249–56
9. Malmberg AB, Yaksh TL: Pharmacology of the spinal action of ketorolac, morphine, ST-91, U50488H, and I-PIA on the formalin test and an isobolographic analysis of the NSAID interaction. *ANESTHESIOLOGY* 1993; 79:270–81
10. Malmberg AB, Yaksh TL: Antinociception produced by spinal delivery of the S and R enantiomers of flurbiprofen in the formalin test. *Eur J Pharmacol* 1994; 256:205–9
11. Malmberg AB, Yaksh TL: Spinal nitric oxide synthesis inhibition blocks NMDA-induced thermal hyperalgesia and produces antinociception in the formalin test in rats. *Pain* 1993; 54:291–300
12. Björkman R, Hallman KM, Hedner J, Hedner T, Henning M: Acetaminophen blocks spinal hyperalgesia induced by NMDA and substance P. *Pain* 1994; 57:259–64
13. Björkman R, Hallman KM, Hedner J, Hedner T, Henning M: Nonsteroidal antiinflammatory drug modulation of behavioral responses to intrathecal N-methyl-D-aspartate, but not to substance P and amino-methyl-isoxazole-propionic acid in the rat. *J Clin Pharmacol* 1996; 36:20S–6S
14. Feelisch M, Noack E: Nitric oxide (NO) formation from nitrovasodilators occurs independently of hemoglobin or non-heme iron. *Eur J Pharmacol* 1987; 142:465–9
15. Moncada S, Palmer RM, Higgs EA: Nitric oxide: Physiology, pathophysiology, and pharmacology. *Pharmacol Rev* 1991; 43:109–42
16. Harrison DG, Bates JN: The nitrovasodilators. New ideas about old drugs. *Circulation* 1993; 87:1461–7
17. Ma SX, Schmid PG Jr, Long JP: Noradrenergic mechanisms and the cardiovascular actions of nitroglycerin. *Life Sci* 1994; 55:1595–603
18. Melis MR, Argiolas A: Nitric oxide donors induce penile erection



and yawning when injected in the central nervous system of male rats. *Eur J Pharmacol* 1995; 294:1-9

19. Wang BC, Li D, Hiller JM, Hillman DE, Pasternack BS, Turndorf H: The antinociceptive effect of S-(+)-ibuprofen in rabbits: Epidural versus intravenous administration. *Anesth Analg* 1995; 80:92-6

20. Lauretti GR, Reis MP, Mattos AL, Gomes JM, Oliveira AP, Pereira NL: Epidural nonsteroidal antiinflammatory drugs for cancer pain. *Anesth Analg* 1998; 86:117-8

21. Kream RM, Kato T, Shimonaka H, Marchand JE, Wurm WH: Substance P markedly potentiates the antinociceptive effects of morphine sulfate administered at the spinal level. *Proc Natl Acad Sci U S A* 1993; 90:3564-8

22. Dubuisson D, Dennis SG: The formalin test: A quantitative study of the analgesic effects of morphine, meperidine, and brain stem stimulation in rats and cats. *Pain* 1977; 4:161-74

23. Tjølsen A, Berge OG, Hunskaar S, Rosland JH, Hole K: The formalin test: An evaluation of the method. *Pain* 1992; 51:5-17

24. Green LC, Wagner DA, Glogowski J, Skipper PL, Wishnok JS, Tannenbaum SR: Analysis of nitrate, nitrite, and [ $^{15}\text{N}$ ]nitrate in biological fluids. *Anal Biochem* 1982; 126:131-8

25. Suzuki Y, Osuka K, Noda A, Tanazawa T, Takayasu M, Shibuya M, Yoshida J: Nitric oxide metabolites in the cisternal cerebral spinal fluid of patients with subarachnoid hemorrhage. *Neurosurgery* 1997; 41:807-12

26. Adams SS, Bresloff P, Mason CG: Pharmacological differences between the optical isomers of ibuprofen: Evidence for metabolic inversion of the (-)-isomer. *J Pharm Pharmacol* 1976; 28:256-7

27. Garcia Rafanell J, Forn J: Correlation between antiinflammatory activity and inhibition of prostaglandin biosynthesis induced by various non-steroidal antiinflammatory agents. *Arzneimittelforschung* 1979; 29:630-3

28. Vane JR, Botting RM: Mechanism of action of anti-inflammatory drugs. *Scand J Rheumatol Suppl* 1996; 102:9-21

29. Jurna I, Spohrer B, Bock R: Intrathecal injection of acetylsalicylic acid, salicylic acid and indomethacin depresses C fibre-evoked activity in the rat thalamus and spinal cord. *Pain* 1992; 49:249-56

30. Gelgor L, Mitchell D: Prostanoid synthesis in the spinal cord enhances excitability of dorsal horn convergent neurones during reperfusion of ischaemic receptive fields on the rat's tail. *Pain* 1995; 60:181-7

31. Kitto KF, Haley JE, Wilcox GL: Involvement of nitric oxide in spinally mediated hyperalgesia in the mouse. *Neurosci Lett* 1992; 148:1-5

32. Garry MG, Richardson JD, Hargreaves KM: Sodium nitroprusside evokes the release of immunoreactive calcitonin gene-related peptide and substance P from dorsal horn slices via nitric oxide-dependent and nitric oxide-independent mechanisms. *J Neurosci* 1994; 14:4329-37

33. Ferreira SH, Lorenzetti BB, Faccioli LH: Blockade of hyperalgesia and neurogenic oedema by topical application of nitroglycerin. *Eur J Pharmacol* 1992; 217:207-9

34. Redford EJ, Kapoor R, Smith KJ: Nitric oxide donors reversibly block axonal conduction: Demyelinated axons are especially susceptible. *Brain* 1997; 120:2149-571

35. Chung SJ, Chong S, Seth P, Jung CY, Fung HL: Conversion of nitroglycerin to nitric oxide in microsomes of the bovine coronary artery smooth muscle is not primarily mediated by glutathione-S-transferases. *J Pharmacol Exp Ther* 1992; 260:652-9

36. Yano T, Nakagawa A, Tsuji M, Noda K: Skin permeability of various non-steroidal anti-inflammatory drugs in man. *Life Sci* 1986; 39:1043-50

37. Bernards CM, Hill HF: Physical and chemical properties of drug molecules governing their diffusion through the spinal meninges. *ANESTHESIOLOGY* 1992; 77:750-6

38. Bannwarth B, Netter P, Pourel J, Royer RJ, Gaucher A: Clinical pharmacokinetics of nonsteroidal anti-inflammatory drugs in the cerebrospinal fluid. *Biomed Pharmacother* 1989; 43:121-6

39. Zecca L, Ferrario P, Costi P: Determination of diclofenac and its metabolites in plasma and cerebrospinal fluid by high-performance liquid chromatography with electrochemical detection. *J Chromatogr* 1991; 567:425-32

40. Rice AS, Lloyd J, Bullingham RE, O'Sullivan G: Ketorolac penetration into the cerebrospinal fluid of humans. *J Clin Anesth* 5:459-62

41. Tortorici V, Vanegas H: Anti-nociception induced by systemic or PAG-microinjected lysine-acetylsalicylate in rats. Effects on tail-flick related activity of medullary off- and on-cells. *Eur J Neurosci* 1995; 7:1857-65

42. McCormack K: The spinal actions of nonsteroidal anti-inflammatory drugs and the dissociation between their anti-inflammatory and analgesic effects. *Drugs* 1994; 5:28-45

43. Roth SH: NSAID gastropathy. A new understanding. *Arch Intern Med* 1996; 156:1623-8

44. Matzke GR: Nonrenal toxicities of acetaminophen, aspirin, and nonsteroidal anti-inflammatory agents. *Am J Kidney Dis* 1996; 28:S63-70

45. McCormack K: Non-steroidal anti-inflammatory drugs and spinal nociceptive processing. *Pain* 1994; 59:9-43
